# Supplementary material
Source: Springer Nature journal article supplement (https://www.springermedizin.de/resource/supplementary/12998_2011_22_MOESM2_ESM.pdf/9679992)
Supplement: MOESM2 [file 9679992]

Table 1: Questions of the semi-structured interviews.

|                                                                                                                                                                                                                                                                                                                                                                  |
|------------------------------------------------------------------------------------------------------------------------------------------------------------------------------------------------------------------------------------------------------------------------------------------------------------------------------------------------------------------|
| <b><i>Impact on personal, social and occupational life</i></b>                                                                                                                                                                                                                                                                                                   |
| <ul style="list-style-type: none"><li>▪ How has fibromyalgia influenced your professional life/career?</li><li>▪ What are your preferred leisure activities? What impact did your condition have on them?</li><li>▪ How does your partner/husband/wife/housemate cope with it? Do you feel they understand and accept it? How did and do they respond?</li></ul> |
| <b><i>Patients' views, attitudes and behaviours with regards to their future</i></b>                                                                                                                                                                                                                                                                             |
| <ul style="list-style-type: none"><li>▪ When you were first diagnosed, how did you see your future?</li><li>▪ How do you see your future now?</li><li>▪ If changed: what do you think brought about this change?</li></ul>                                                                                                                                       |
| <b><i>How do patients with fibromyalgia feel about expressing what they experience? And how do they feel they are perceived by others?</i></b>                                                                                                                                                                                                                   |
| <ul style="list-style-type: none"><li>▪ How do you feel when people ask you 'How are you'? When close friend/family ask it? When more distant relations ask it?</li><li>▪ Do you feel you can say how you feel to close family/friend/doctors?</li><li>▪ How do you perceive their reactions if you do express how you feel?</li></ul>                           |
